# Supplementary material for: Case study of mesospheric front dissipation observed over the northeast of Brazil
Source: Copernicus journal article supplement (doi:10.5194/angeo-36-311-2018), 2018-03-05
Supplement: Supplementary file 1 [file angeo-36-311-2018-supplement.zip]

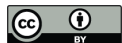

## *Supplement of*

# **Case study of mesospheric front dissipation observed over the northeast of Brazil**

**Amauri Fragoso Medeiros et al.**

*Correspondence to:* Igo Paulino (igopaulino@gmail.com)

- [angeo-36-311-2018-supplement-title-page.pdf](#)
- [20051003\\_Medeiros\\_2017\\_ANGEO.avi](#)
- [20051003\\_bore\\_OI5577.avi](#)

The copyright of individual parts of the supplement might differ from the CC BY 4.0 License.
